# Supplementary material for: Evaluation of serum parameters to predict the dietary intake of calcium and available phosphorus in growing pigs
Source: PubMed Central journal article supplement — Transl Anim Sci. 2021 Mar 20;5(2):txab059. doi: 10.1093/tas/txab059 (PMC8244991; doi:10.1093/tas/txab059), 2021-03-20
Supplement: txab059_suppl_supplementary_material.pdf [file txab059_suppl_supplementary_material.pdf]

1 **Table S1.** Effect of dietary phytase and sex on average daily total phosphorus, available and  
 2 calcium intake in growing pigs during the fattening period\*

| Dietary treatment                              | Con   |         | Phy   |         | <i>P</i> – Value <sup>b</sup> |         |        |                  |
|------------------------------------------------|-------|---------|-------|---------|-------------------------------|---------|--------|------------------|
|                                                | Gilts | Barrows | Gilts | Barrows | SEM                           | Phytase | Sex    | Phytase<br>× Sex |
| Average daily total phosphorus intake, g/d     |       |         |       |         |                               |         |        |                  |
| Day 1-49                                       | 12.9  | 14.9    | 12.0  | 13.5    | 0.21                          | <0.001  | 0.009  | 0.327            |
| Day 1-8                                        | 11.1  | 11.8    | 10.4  | 11.4    | 0.32                          | 0.106   | 0.008  | 0.643            |
| Day 9-22                                       | 12.1  | 14.1    | 11.1  | 12.9    | 0.25                          | <0.001  | <0.001 | 0.760            |
| Day 23-35                                      | 12.9  | 15.2    | 12.3  | 13.8    | 0.28                          | 0.001   | <0.001 | 0.185            |
| Day 36-49                                      | 14.6  | 17.0    | 13.2  | 14.8    | 0.41                          | <0.001  | 0.016  | 0.407            |
| Average daily available phosphorus intake, g/d |       |         |       |         |                               |         |        |                  |
| Day 1-49                                       | 6.7   | 7.8     | 7.9   | 8.9     | 0.12                          | <0.001  | <0.001 | 0.842            |
| Day 1-8                                        | 5.8   | 6.2     | 6.9   | 7.5     | 0.20                          | <0.001  | 0.015  | 0.621            |
| Day 9-22                                       | 6.3   | 7.3     | 7.4   | 8.6     | 0.15                          | <0.001  | <0.001 | 0.731            |
| Day 23-35                                      | 6.7   | 7.9     | 8.2   | 9.2     | 0.16                          | <0.001  | <0.001 | 0.527            |
| Day 36-49                                      | 7.6   | 8.9     | 8.7   | 9.7     | 0.25                          | <0.001  | <0.001 | 0.741            |
| Average daily calcium intake, g/d              |       |         |       |         |                               |         |        |                  |
| Day 1-49                                       | 17.0  | 19.6    | 16.1  | 18.1    | 0.27                          | <0.001  | <0.001 | 0.359            |
| Day 1-8                                        | 14.6  | 15.5    | 13.9  | 15.4    | 0.43                          | 0.330   | 0.009  | 0.641            |
| Day 9-22                                       | 15.9  | 18.6    | 14.9  | 17.4    | 0.33                          | 0.001   | <0.001 | 0.798            |
| Day 23-35                                      | 16.9  | 20.1    | 16.5  | 18.6    | 0.37                          | 0.015   | <0.001 | 0.203            |
| Day 36-49                                      | 19.2  | 22.4    | 17.7  | 19.8    | 0.55                          | <0.001  | <0.001 | 0.431            |

3 <sup>a</sup>Con, control diet; Phy, phytase diet. Values are presented as least square means with  
 4 the standard error of the mean.

5 <sup>b</sup>Fixed effect of time was significant (*P* < 0.001) for all parameters.

6 **Table S2.** Effect of dietary phytase and sex on serum parameters in growing pigs during the fattening period\*

| Dietary treatment  |                   | Con   |                    | Phy               |                    | P – Value <sup>b</sup> |       |         |       |               |
|--------------------|-------------------|-------|--------------------|-------------------|--------------------|------------------------|-------|---------|-------|---------------|
| Item <sup>c</sup>  | Time              | SEM   | Gilts              | Barrows           | Gilts              | Barrows                | SEM   | Phytase | Sex   | Phytase × Sex |
| Serum P, mmol/L    |                   |       |                    |                   |                    |                        |       |         |       |               |
| Day 2              | 2.83 <sup>y</sup> | 0.028 | 2.60               | 2.76              | 3.00               | 3.08                   | 0.042 | <0.001  | 0.006 | 0.305         |
| Day 23             | 2.99 <sup>x</sup> | 0.020 | 2.88               | 2.97              | 3.04               | 3.11                   | 0.040 | <0.001  | 0.044 | 0.749         |
| Day 52             | 2.88 <sup>y</sup> | 0.020 | 2.92               | 2.90              | 2.83               | 2.79                   | 0.034 | 0.004   | 0.409 | 0.760         |
| Serum Ca, mmol/L   |                   |       |                    |                   |                    |                        |       |         |       |               |
| Day 2              | 2.63 <sup>x</sup> | 0.014 | 2.71               | 2.71              | 2.57               | 2.56                   | 0.022 | <0.001  | 0.863 | 0.783         |
| Day 23             | 2.64 <sup>x</sup> | 0.010 | 2.66               | 2.64              | 2.60               | 2.66                   | 0.024 | 0.521   | 0.460 | 0.139         |
| Day 52             | 2.59 <sup>y</sup> | 0.003 | 2.57 <sup>ab</sup> | 2.60 <sup>a</sup> | 2.59 <sup>ab</sup> | 2.56 <sup>a</sup>      | 0.014 | 0.384   | 0.757 | 0.029         |
| Serum Ca:P         |                   |       |                    |                   |                    |                        |       |         |       |               |
| Day 2              | 0.94 <sup>x</sup> | 0.009 | 1.05               | 0.99              | 0.86               | 0.83                   | 0.015 | <0.001  | 0.006 | 0.308         |
| Day 23             | 0.89 <sup>z</sup> | 0.006 | 0.93               | 0.89              | 0.86               | 0.86                   | 0.010 | <0.001  | 0.069 | 0.124         |
| Day 52             | 0.91 <sup>y</sup> | 0.006 | 0.89               | 0.90              | 0.92               | 0.92                   | 0.011 | 0.020   | 0.270 | 0.614         |
| Serum FGF23, pg/ml |                   |       |                    |                   |                    |                        |       |         |       |               |
| Day 2              | 1127 <sup>x</sup> | 34.8  | 1245               | 1232              | 1074               | 1182                   | 84.6  | 0.212   | 0.591 | 0.494         |
| Day 23             | 990 <sup>y</sup>  | 30.3  | 988                | 1014              | 1028               | 1096                   | 50.8  | 0.236   | 0.357 | 0.678         |
| Day 52             | 902 <sup>z</sup>  | 30.1  | 813                | 836               | 919                | 872                    | 52.0  | 0.165   | 0.823 | 0.492         |
| Serum VitD, pg/ml  |                   |       |                    |                   |                    |                        |       |         |       |               |
| Day 2              | 18.0 <sup>x</sup> | 0.37  | 18.5               | 17.0              | 18.9               | 18.6                   | 0.74  | 0.155   | 0.200 | 0.420         |
| Day 23             | 15.5 <sup>y</sup> | 0.27  | 15.5               | 15.6              | 15.6               | 15.6                   | 0.44  | 0.907   | 0.884 | 0.996         |
| Day 52             | 15.4 <sup>y</sup> | 0.26  | 15.6               | 16.4              | 14.9               | 16.4                   | 0.51  | 0.507   | 0.019 | 0.472         |
| Serum ALP, U/L     |                   |       |                    |                   |                    |                        |       |         |       |               |
| Day 2              | 209 <sup>x</sup>  | 3.5   | 200                | 206               | 195                | 194                    | 9.1   | 0.346   | 0.786 | 0.703         |
| Day 23             | 179 <sup>y</sup>  | 2.8   | 179                | 169               | 192                | 182                    | 5.7   | 0.028   | 0.105 | 0.981         |
| Day 52             | 157 <sup>z</sup>  | 2.9   | 151                | 155               | 168                | 157                    | 5.4   | 0.070   | 0.491 | 0.160         |

|                            |                    |       |                   |                   |                   |                   |      |        |        |       |
|----------------------------|--------------------|-------|-------------------|-------------------|-------------------|-------------------|------|--------|--------|-------|
| Serum OCN, ng/ml           |                    |       |                   |                   |                   |                   |      |        |        |       |
| Day 2                      | 31.2 <sup>y</sup>  | 0.70  | 32.8              | 31.5              | 31.4              | 30.1              | 1.10 | 0.196  | 0.220  | 0.976 |
| Day 23                     | 33.0 <sup>x</sup>  | 0.47  | 32.5              | 32.0              | 34.6              | 33.1              | 0.88 | 0.070  | 0.265  | 0.562 |
| Day 52                     | 28.5 <sup>z</sup>  | 0.47  | 26.7              | 27.5              | 28.5              | 29.2              | 0.94 | 0.063  | 0.415  | 0.886 |
| Serum urea, mg/dL          |                    |       |                   |                   |                   |                   |      |        |        |       |
| Day 2                      | 14.3 <sup>z</sup>  | 0.49  | 12.3              | 14.4              | 14.0              | 14.5              | 0.54 | 0.087  | 0.017  | 0.151 |
| Day 23                     | 18.7 <sup>y</sup>  | 0.35  | 16.3 <sup>b</sup> | 21.9 <sup>a</sup> | 17.2 <sup>b</sup> | 20.3 <sup>a</sup> | 0.63 | 0.596  | <0.001 | 0.045 |
| Day 52                     | 22.8 <sup>x</sup>  | 0.36  | 18.3              | 24.8              | 21.0              | 25.6              | 0.81 | 0.033  | <0.001 | 0.234 |
| Serum cholesterol, mg/dL   |                    |       |                   |                   |                   |                   |      |        |        |       |
| Day 2                      | 85.5 <sup>z</sup>  | 1.09  | 87.9              | 91.7              | 84.8              | 85.4              | 2.11 | 0.025  | 0.291  | 0.437 |
| Day 23                     | 89.7 <sup>y</sup>  | 0.80  | 88.4              | 90.7              | 86.6              | 91.3              | 1.43 | 0.692  | 0.016  | 0.408 |
| Day 52                     | 97.6 <sup>x</sup>  | 0.82  | 96.8              | 100.0             | 98.0              | 99.7              | 1.66 | 0.805  | 0.142  | 0.645 |
| Serum triglycerides, mg/dL |                    |       |                   |                   |                   |                   |      |        |        |       |
| Day 2                      | 28.2 <sup>x</sup>  | 0.84  | 28.1              | 31.0              | 26.0              | 27.2              | 1.47 | 0.047  | 0.175  | 0.568 |
| Day 23                     | 25.3 <sup>y</sup>  | 0.59  | 25.6              | 24.3              | 24.3              | 25.8              | 1.09 | 0.950  | 0.935  | 0.195 |
| Day 52                     | 29.2 <sup>x</sup>  | 0.61  | 27.3              | 29.7              | 31.7              | 31.1              | 1.12 | 0.010  | 0.410  | 0.179 |
| Serum NEFA, $\mu$ mol/L    |                    |       |                   |                   |                   |                   |      |        |        |       |
| Day 2                      | 19.9 <sup>y</sup>  | 22.3  | 38.3              | 39.1              | 41.8              | 44.1              | 4.62 | 0.357  | 0.742  | 0.869 |
| Day 23                     | 30.4 <sup>y</sup>  | 17.93 | 43.6              | 42.1              | 52.7              | 44.0              | 8.24 | 0.472  | 0.509  | 0.636 |
| Day 52                     | 236.1 <sup>x</sup> | 18.04 | 185.2             | 186.2             | 314.6             | 322.8             | 37.2 | <0.001 | 0.895  | 0.916 |

<sup>a</sup>Con, control diet; Phy, phytase diet; Values are presented as least square means with the standard error of the mean.

<sup>b</sup>Fixed effect of time was significant ( $P < 0.001$ ) for all parameters.

<sup>c</sup>P, phosphorus; Ca, calcium; Ca:P ratio, calcium:phosphorus ratio; FGF23, fibroblast growth factor 23; VitD, Vitamin D; ALP, alkaline phosphatase; OCN, osteocalcin; NEFA, non-esterified fatty acids

<sup>a,b</sup>Different superscript letters indicate significant differences for the interaction of phytase  $\times$  sex ( $P < 0.05$ ).

<sup>x,y,z</sup>Different superscript letters indicate significant differences between experimental days ( $P < 0.05$ ).

13 **Table S3.** Pearson's correlation between calcium (Ca), total phosphorus (tP) and available phosphorus (aP) and serum parameters urea, cholesterol,  
 14 triglyceride and non-esterified fatty acids in gilts and barrows\*

| Item                      | Week <sup>b</sup> | Gilts         |                |                |                   |                   | Barrows       |                |                |                   |                   |
|---------------------------|-------------------|---------------|----------------|----------------|-------------------|-------------------|---------------|----------------|----------------|-------------------|-------------------|
|                           |                   | P intake, g/d | aP intake, g/d | Ca intake, g/d | Daily Ca:tP ratio | Daily Ca:aP ratio | P intake, g/d | aP intake, g/d | Ca intake, g/d | Daily Ca:tP ratio | Daily Ca:aP ratio |
| Serum urea, mg/dL         | 1                 | 0.45*         | 0.55*          | 0.46*          | 0.31              | -0.31             | 0.16          | 0.14           | 0.16           | -0.02             | 0.02              |
|                           | 4                 | 0.33          | 0.34           | 0.34           | 0.16              | -0.16             | 0.31          | 0.16           | 0.31           | -0.13             | 0.13              |
|                           | 8                 | 0.37*         | 0.50*          | 0.38*          | 0.28              | -0.28             | 0.59*         | 0.63*          | 0.60*          | 0.05              | -0.05             |
| Serum cholesterol, mg/dL  | 1                 | 0.27          | 0.17           | 0.27           | -0.09             | 0.09              | -0.07         | -0.27          | -0.09          | -0.30             | 0.30              |
|                           | 4                 | -0.09         | -0.11          | -0.09          | -0.07             | 0.07              | 0.15          | 0.13           | 0.15           | 0.02              | -0.02             |
|                           | 8                 | -0.58*        | -0.47*         | -0.58*         | 0.09              | -0.09             | -0.45*        | -0.44*         | -0.45*         | 0.04              | -0.04             |
| Serum triglyceride, mg/dL | 1                 | -0.16         | -0.20          | -0.16          | -0.20             | 0.20              | 0.07          | -0.11          | 0.05           | -0.25             | 0.25              |
|                           | 4                 | 0.01          | -0.04          | 0.00           | -0.07             | 0.07              | 0.13          | 0.20           | 0.14           | 0.12              | -0.12             |
|                           | 8                 | -0.40*        | -0.19          | -0.39*         | 0.27              | -0.27             | -0.36         | -0.30          | -0.36*         | 0.11              | -0.11             |
| Serum NEFA, μmol/L        | 1                 | 0.20          | 0.21           | 0.21           | 0.09              | -0.09             | -0.23*        | -0.15          | -0.23          | 0.10              | -0.10             |
|                           | 4                 | -0.11         | 0.00           | -0.10          | 0.11              | -0.11             | -0.10         | -0.08          | -0.11          | 0.03              | -0.03             |
|                           | 8                 | -0.65*        | -0.45*         | -0.64*         | 0.32              | -0.32             | -0.68*        | -0.59*         | -0.68*         | 0.34              | -0.34             |

15 <sup>a</sup>P, phosphorus; aP, available phosphorus; Ca, calcium; daily Ca:tP ratio, daily calcium:total phosphorus ratio, daily Ca:aP ratio, daily  
 16 calcium:available phosphorus ratio; NEFA, non-esterified fatty acids

17 <sup>b</sup>Week 1: Correlation between Ca, total P (tP) and available P (aP) intake from days 1-7 and serum parameters from days 2 and 3 (in week 1).

18 Week 4: Correlation between Ca, total P (tP) and available P (aP) intake from days 22-28 and serum parameters from 23 and 24 (in week 4).

19 Week 8: Correlation between Ca, total P (tP) and available P (aP) intake from days 50-56 and serum parameters days from 52 and 53 (in week 8).

20 \*|r| > 0.35 and P < 0.05.

21 **Figure S1.** Body weight gain (BWG, kg/d), feed intake (FI, kg/d) and gain:feed ratio of pigs  
22 grouped by sex (A) or by treatment group (B). <sup>x,y</sup>Different superscript letters indicate significant  
23 differences ( $P < 0.05$ ) between sex (A) or dietary treatments.

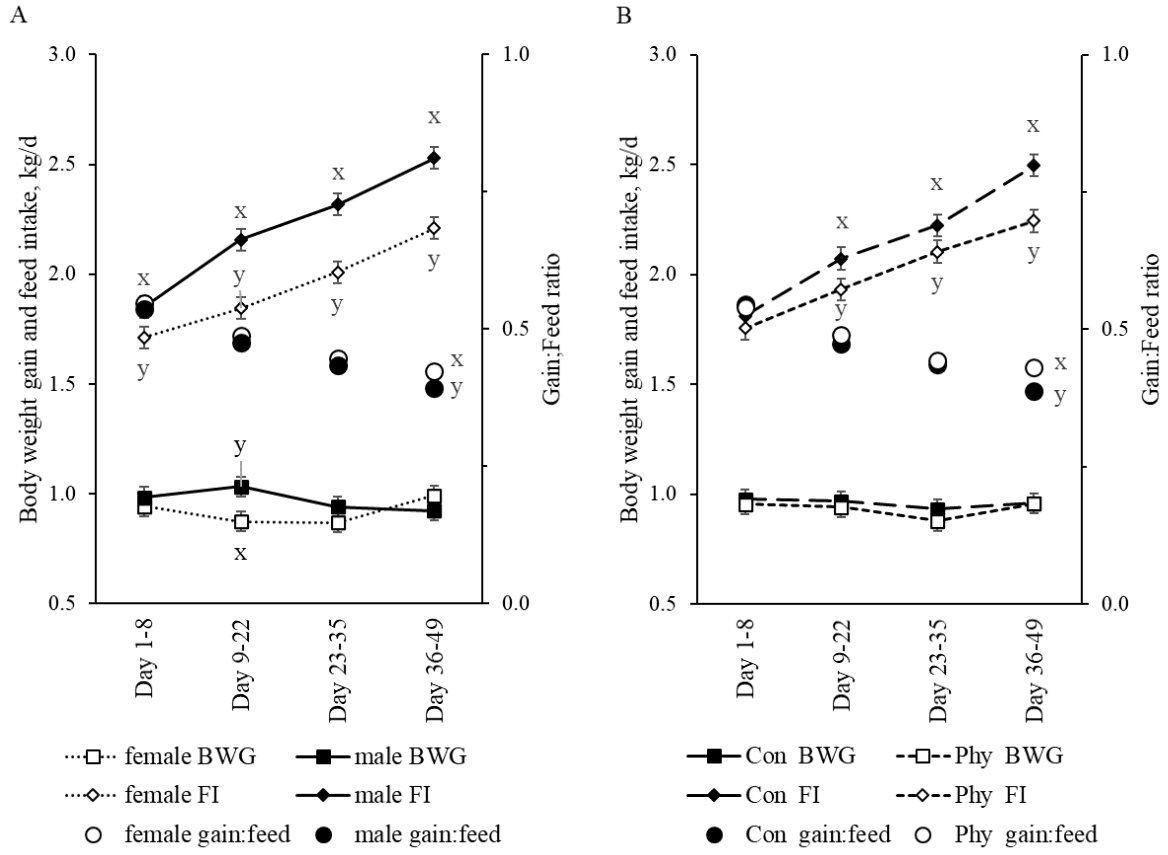

24  
25

**Figure S1.**
